# Supplementary material
Source: publisher site journal article supplement (https://www.dovepress.com/article/390658)
Supplement: Supplementary file 1 [file get_supplementary_file.php]

**Supplemental Materials**

**Supplemental Materials - S1.** Follow-up Probes.

| Probe | Purpose |
| --- | --- |
| Can you explain that further? | Clarification |
| Can you tell me more about…? | Clarification |
| Can you describe that for me? | Clarification |
| What is/was that like? | Clarification |
| Is this an accurate way to describe what you just said? | Summarizing |
| Have I got this right? | Clarification |
| Did I leave anything out? | Summarizing |
| Is there anything else you would like to share with me? | Expansion |
| What else can you tell me about your experience? | Expansion |

**Supplemental Materials - S2.** Phantom Limb Pain treatments self-reported in a sample of 50 Veteran participants.

| **Treatment** | **Frequency Count** |
| --- | --- |
| Mirror Therapy | 16 |
| Physical Therapy | 15 |
| Massage/Rub/Pat residual limb | 13 |
| Compression Sock/Shrinker | 8 |
| Marijuana | 6 |
| Remove prosthesis | 5 |
| Put prosthesis on to walk | 5 |
| Heat/Cold | 4 |
| Exercise/Activity | 4 |
| Lotion/Salve | 3 |
| Meditation | 3 |
| Acupuncture/Acupressure | 2 |
| Aromatherapy (oils, incense) | 2 |
| CBD Lotion | 2 |
| Grounding mat | 1 |
| Biofeedback | 1 |
| Hypnotism | 1 |
| Right/Left discrimination cards for GMI | 1 |
| Chiropractor | 1 |
| Lidocaine patch | 1 |
| Botulinum Toxin Injections | 1 |
| Nerve block | 1 |
| TENS unit | 1 |

NOTE. If a participant reported more than one PLP treatment method tried (e.g., massage and TENS unit), each method was counted separately. CBD: Cannabidiol; GMI: Graded Motor Imagery; TENS: Transcutaneous Electrical Stimulation.
